# Supplementary material
Source: Springer Nature journal article supplement (https://www.springermedizin.de/resource/supplementary/12888_2014_1654_MOESM1_ESM.pdf/9481114)
Supplement: MOESM1 [file 9481114]

**Whitehall II  
Phase 11  
referral**

**Phone Screening ~ 2-4wks**

**before scan:**

1. Still interested?
2. Study outline
3. MRI safety check
4. Offer & confirm testing day/time
5. Travel arrangements
6. Special Circumstances
7. Contact details check

**Confirmation Letter 1-2 days**

**after screening:**

- Date & time of testing
- New Information sheets
- Consent forms
- Questionnaire
- Travel directions
- Expenses form
- FMRIB safety form

**Reminder Phone Call:**

- Time of testing
- Check means of arrival
- Arrange meeting place
- Reminder to fill in & bring questionnaire
- Reminder to keep receipts
- MRI safe clothing

**MRI safety check**

**No Implant**

**Possible Implant**

**Consent participant to contact hospital if they don't have surgery/implant information readily available**

**Radiographers to confirm safety**

**Safe**

**Not safe**

**Exclude**

**Day of Testing:**

1. Sign consent (180 mins. before scan)
2. Collect questionnaire
3. Complete missing items, if any
4. FMRIB safety form
5. Neuropsychological testing
6. Clinical interview
7. Scan (60 mins.)
8. Bloods & cheek swabs
